# Supplementary material for: CASPT2 study of inverse sandwich-type dinuclear 3d transition metal complexes of ethylene and dinitrogen molecules: similarities and differences in geometry, electronic structure, and spin multiplicity
Source: Royal Society of Chemistry journal article supplement (doi:10.1039/c5cp01350j), 2015-01-01
Supplement: c5cp01350j1.pdf [file c5cp01350j1.pdf]

**Supporting Information:**

**CASPT2 Study of Inverse Sandwich-Type Dinuclear 3d Transition Metal  
Complexes of Ethylene and Dinitrogen Molecules:  
Similarities and Differences in Geometry, Electronic Structure, and  
Spin Multiplicity**

**Masayuki Nakagaki and Shigeyoshi Sakaki\***

Fukui Institute for Fundamental Chemistry, Kyoto University, Takano-Nishihiraki-cho,  
Sakyo-ku, Kyoto 606-8103, Japan

Corresponding author: E-mail: sakaki.shigeyoshi.47e@st.kyoto-u.ac.jp

Table S1 Relative energies (kcal/mol) of  $\eta^1$ -end and  $\eta^2$ -side structures calculated by CASPT2 method with two different active spaces.

|                                         | Co in quintet |           | Ni in triplet |           |
|-----------------------------------------|---------------|-----------|---------------|-----------|
|                                         | (8e,8o)       | (12e,10o) | (6e,6o)       | (14e,10o) |
| $\Delta E(\eta^2-\eta^1)$               |               |           |               |           |
| CASSCF                                  | 5.2           | 4.6       | 14.9          | 13.3      |
| CASPT2                                  | 4.8           | 5.3       | 2.5           | 15.1      |
| Reference weight of CASSCF wavefunction |               |           |               |           |
| $\eta^1$ -end                           | 0.683         | 0.690     | 0.676         | 0.678     |
| $\eta^2$ -side                          | 0.685         | 0.688     | 0.664         | 0.679     |

In the dinitrogen ISTCs of Co and Ni, we carried out CASPT2 calculations with larger active space including  $\pi$  orbitals. In the ISTC of Co, the relative energy between side-on and end-on structures is different little between the smaller and larger active spaces; see Table S1. This result indicates that the  $\pi$  orbitals are not important in the Co complex and also in the Sc to Mn complexes which exist in the left-hand side of Co in the periodic table; remember that the  $\pi$  orbitals become more important as going from the left-hand side to the right-hand side in the periodic table because the d orbital becomes more stable in energy as going to the right-hand side from the left-hand side. In the ISTC of Ni, however, the relative stabilities of the end-on and side-on coordination structures are somewhat different between the smaller and larger active spaces. This is because d-orbital energy becomes lower as going from Co to Ni and the CT from the  $\pi$  orbital of dinitrogen to the metal becomes stronger in the Ni complex to contribute to the larger stability of the end-on structure. Judging from these results, we employed the active space without the  $\pi$  orbitals for M = Sc to Co but the active space including the  $\pi$  orbitals for M = Ni.

In the ethylene ISTC of Ni, however, the  $\pi$  orbital could not be included in the active space because the  $\pi$  orbital went out from the active space during CASSCF calculation. This result indicates that the  $\pi$  orbital is not important in the active space of the ethylene ISTCs. We did not include the  $\pi$  orbital in the active space of these ethylene complexes.

Table S2. Eigenvalues of  $(\mu\text{-}\eta^2\text{:}\eta^2\text{-N}_2)\text{[Cr(AIP)]}_2$  including spin orbit coupling calculated by an effective one-electron Fock-type spin-orbit Hamiltonian is used suggested by Hess and coworkers. The geometry of singlet spin state was taken.

| Absolute energy / a.u. | Relative energy / $\text{cm}^{-1}$ | J_eff | Omega |
|------------------------|------------------------------------|-------|-------|
| -2657.03326924         | 0.00                               | 0.0   | 0.0   |
| -2657.03304100         | 50.09                              | 1.0   | 1.0   |
| -2657.03304100         | 50.09                              | 1.0   | 0.0   |
| -2657.03304100         | 50.09                              | 1.0   | 1.0   |
| -2657.03259705         | 147.53                             | 2.0   | 2.0   |
| -2657.03259705         | 147.53                             | 2.0   | 1.0   |
| -2657.03259705         | 147.53                             | 2.0   | 0.0   |
| -2657.03259705         | 147.53                             | 2.0   | 1.0   |
| -2657.03259705         | 147.53                             | 2.0   | 2.0   |
| -2657.03196453         | 286.35                             | 3.0   | 3.0   |
| -2657.03196453         | 286.35                             | 3.0   | 2.0   |
| -2657.03196453         | 286.35                             | 3.0   | 1.0   |
| -2657.03196453         | 286.35                             | 3.0   | 0.0   |
| -2657.03196453         | 286.35                             | 3.0   | 1.0   |
| -2657.03196453         | 286.35                             | 3.0   | 2.0   |
| -2657.03196453         | 286.35                             | 3.0   | 3.0   |
| -2657.03119342         | 455.59                             | 4.0   | 4.0   |
| -2657.03119342         | 455.59                             | 4.0   | 3.0   |
| -2657.03119342         | 455.59                             | 4.0   | 2.0   |
| -2657.03119342         | 455.59                             | 4.0   | 1.0   |
| -2657.03119342         | 455.59                             | 4.0   | 0.0   |
| -2657.03119342         | 455.59                             | 4.0   | 1.0   |
| -2657.03119342         | 455.59                             | 4.0   | 2.0   |
| -2657.03119342         | 455.59                             | 4.0   | 3.0   |
| -2657.03119342         | 455.59                             | 4.0   | 4.0   |

Table S3. Important geometrical parameters of  $D_{2h}$ -optimized structures of  $(\mu\text{-}\eta^2\text{:}\eta^2\text{-C}_2\text{H}_4)[\text{Cr}(\text{AIP})]_2$  at the singlet to nonet spin states.

| spin multiplicity | r(Cr-C) | r(C-C) |
|-------------------|---------|--------|
| 9                 | 2.233   | 1.544  |
| 7                 | 2.231   | 1.542  |
| 5                 | 2.230   | 1.540  |
| 3                 | 2.229   | 1.539  |
| 1                 | 2.228   | 1.538  |

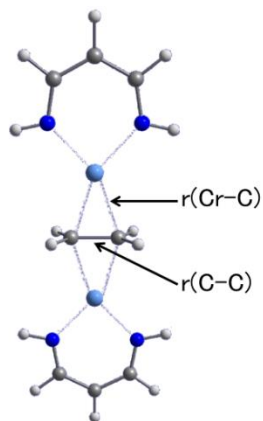

Table S4. Effective magnetic moment ( $\mu_B$ ) estimated by Boltzmann distribution law at 293 K with various geometries.

|                          | CASSCF | CASPT2 |
|--------------------------|--------|--------|
| $D_{2h}$ -optimized      | 4.0    | 1.6    |
| $C_{2h}$ -optimized      | 4.9    | 2.0    |
| X-ray(DDP) <sup>a)</sup> | 3.7    | 1.5    |

a) The substituents were replaced by hydrogen atoms and position of all hydrogen atoms were optimized by DFT(B3LYP) method.

(A) Elongation of Cr-Cr distance

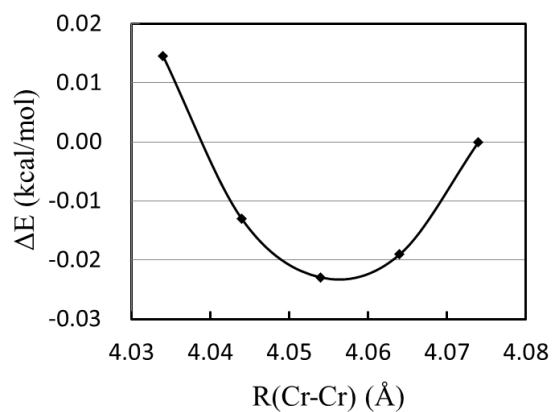

(B) Rotation of  $\text{C}_2\text{H}_4$  moiety

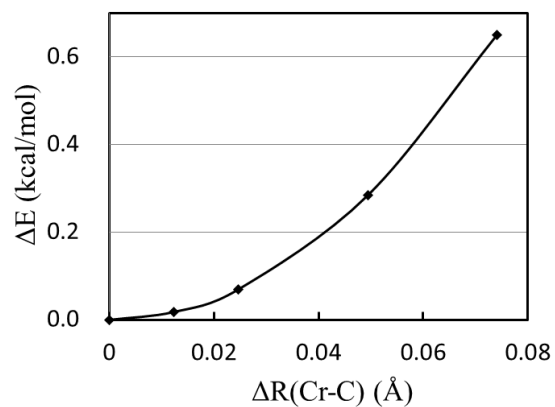

Figure S1. Potential energies of singlet spin state of  $(\mu\text{-C}_2\text{H}_4)[\text{Cr}(\text{AIP})]_2$  at various (A) Cr-Cr distance and (B) orientation of ethylene calculated by the CASPT2 method. The CASSCF-optimized structures were used for other geometrical parameters.

Table S5. Similarities and differences between  $(\mu\text{-C}_2\text{H}_4)[\text{M}(\text{AIP})]_2$  and  $(\mu\text{-N}_2)[\text{M}(\text{AIP})]_2$

(M = Sc to Ni).

|                               |                                               | Sc                                                                | Ti                                                                | V                                                                 | Cr                                                                | Mn                                                                 | Fe                                                                 | Co                                                                 | Ni                                                                 |
|-------------------------------|-----------------------------------------------|-------------------------------------------------------------------|-------------------------------------------------------------------|-------------------------------------------------------------------|-------------------------------------------------------------------|--------------------------------------------------------------------|--------------------------------------------------------------------|--------------------------------------------------------------------|--------------------------------------------------------------------|
|                               | Coordination geometry                         | Planer<br>$\mu\text{-}\eta^2\text{:}\eta^2$<br>(D <sub>2h</sub> ) | Planer<br>$\mu\text{-}\eta^2\text{:}\eta^2$<br>(D <sub>2h</sub> ) | Planer<br>$\mu\text{-}\eta^2\text{:}\eta^2$<br>(D <sub>2h</sub> ) | Planer<br>$\mu\text{-}\eta^2\text{:}\eta^2$<br>(D <sub>2h</sub> ) | Td-like<br>$\mu\text{-}\eta^1\text{:}\eta^1$<br>(C <sub>2h</sub> ) | Td-like<br>$\mu\text{-}\eta^1\text{:}\eta^1$<br>(C <sub>2h</sub> ) | Td-like<br>$\mu\text{-}\eta^1\text{:}\eta^1$<br>(C <sub>2h</sub> ) | Td-like<br>$\mu\text{-}\eta^1\text{:}\eta^1$<br>(C <sub>2h</sub> ) |
| C <sub>2</sub> H <sub>4</sub> | Spin state <sup>a)</sup>                      | OS                                                                | OS                                                                | OS                                                                | OS                                                                | OS                                                                 | OS                                                                 | OS                                                                 | OS                                                                 |
|                               | Energy difference <sup>b)</sup>               | 0.3                                                               | 0.5                                                               | 0.6                                                               | 0.8                                                               | 0.3                                                                | 0.3                                                                | 0.3                                                                | 0.3                                                                |
|                               | Spin density on C <sub>2</sub> H <sub>4</sub> | ~0                                                                | ~0                                                                | ~0                                                                | ~0                                                                | ~0                                                                 | ~0                                                                 | ~0                                                                 | ~0                                                                 |
|                               | Coordination geometry                         | $\eta^2\text{-side}$                                              | $\eta^2\text{-side}$                                              | $\eta^2\text{-side}$                                              | $\eta^2\text{-side}$                                              | $\eta^2\text{-side}$<br>$\sim\eta^1\text{-end}$                    | $\eta^1\text{-end}$                                                | $\eta^1\text{-end}$                                                | $\eta^1\text{-end}$                                                |
| N <sub>2</sub>                | Spin state <sup>a)</sup>                      | OS                                                                | OS                                                                | OS                                                                | OS                                                                | nonet                                                              | septet                                                             | quintet                                                            | triplet                                                            |
|                               | Energy difference <sup>b)</sup>               | 0.4                                                               | 0.8                                                               | 0.4                                                               | 0.4                                                               | 5.0                                                                | 7.3                                                                | 11.3                                                               | 23.3                                                               |
|                               | Spin density on N <sub>2</sub>                | ~0                                                                | ~0                                                                | ~0                                                                | ~0                                                                | negative                                                           | negative                                                           | negative                                                           | negative                                                           |

a) OS = open-shell singlet. b) Energy difference between the ground state and the next spin state.

(A) Lone pair orbital of AIP ligand

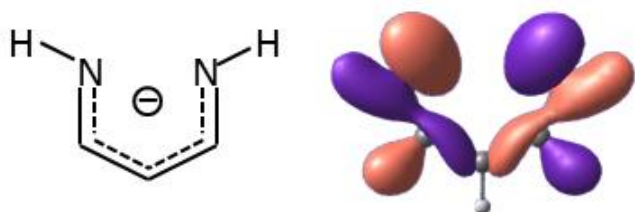

(B) MOs between AIP and M d orbitals

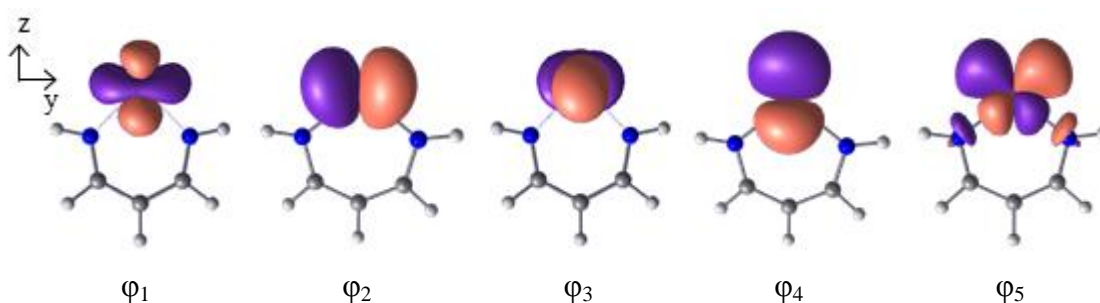

(C) One example of bonding and anti-bonding pairs,  $\phi_5^b$  and  $\phi_5^a$  of  $[M(AIP)]_2$

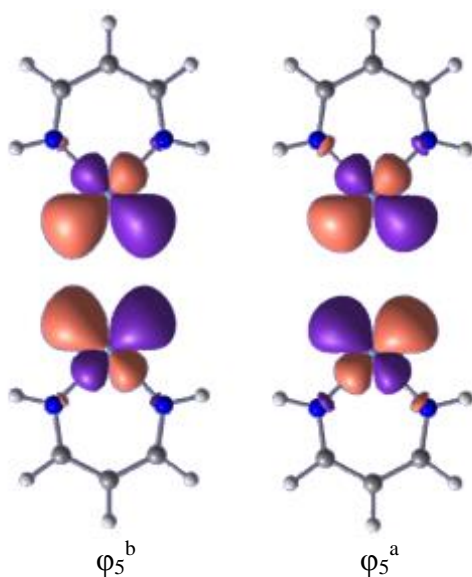

Figure S2. MO diagram of  $M(AIP)$ .

Anti-bonding and bonding pairs of d orbitals,  $\phi_i^a$  and  $\phi_i^b$  ( $i=1$  to  $5$ ) are formed in the  $[M(AIP)]_2$  moiety, which are nearly degenerate because of the long M-M distance. The  $\phi_i^a$  and  $\phi_i^b$  represent anti-bonding and bonding pairs of two d orbitals, respectively.

In an isolated M(AIP), the  $d_{yz}$  orbital is considerably destabilized in energy by the anti-bonding overlap with the two lone pair orbitals of the AIP ligand; see Figure S3(A) for the lone pair orbitals of AIP. Other four d orbitals are nearly degenerate at a lower energy than the  $d_{yz}$  because they are nearly non-bonding, as shown in Figure S3(B). Because two M(AIP) moieties are involved in one ISTC, anti-bonding and bonding pairs of d orbitals,  $\phi_i^a$  and  $\phi_i^b$  ( $i=1$  to 5), are formed in the  $[M(AIP)]_2$  moiety; see Figure S3 (C) for instance. These  $\phi_i^a$  and  $\phi_i^b$  MOs are nearly degenerate because of the long M-M distance. The  $\phi_5^a$ , which is an anti-bonding pair of the  $d_{yz}$  orbitals of two Cr centers, overlaps well with the  $\pi^*$  orbital of ethylene to form the bonding  $\psi_{1,b2g}$  MO and anti-bonding  $\psi_{11,b2g}$  MO in  $(\mu\text{-}\eta^2\text{:}\eta^2\text{-C}_2\text{H}_4)[\text{Cr}(\text{AIP})]_2$ . The  $\phi_5^b$  is a bonding pair of the  $d_{yz}$  orbitals of two Cr centers, which is nearly non-bonding.



**The reason why the benzene ISTC of Cr has a high spin ground state**

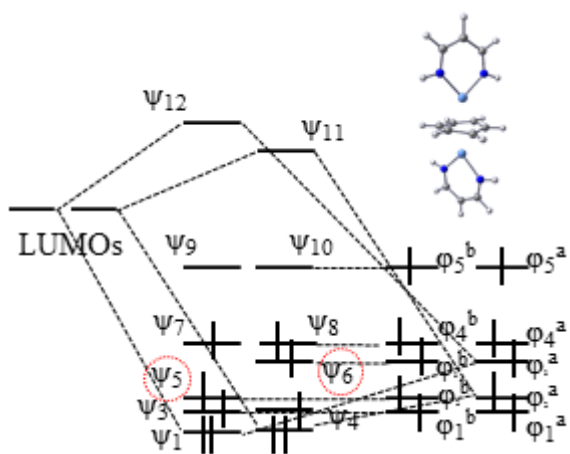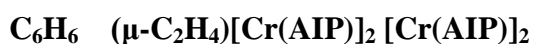

Figure S3. Schematic orbital interaction diagrams of (μ-η<sup>6</sup>:η<sup>6</sup>-C<sub>6</sub>H<sub>6</sub>)[Cr(AIP)]<sub>2</sub>

In the benzene ISTC, the  $d_{x^2-y^2}$  and  $d_{xy}$  orbitals form bonding  $\psi_1$  and  $\psi_2$  MOs with the LUMO of benzene. The  $\psi_5$  and  $\psi_6$ , which are non-bonding MOs consisting of  $d_{x^2-y^2}$  and  $d_{xy}$  orbitals, respectively, are singly occupied, as shown in Figure S2. The one-electron excitation from the  $\psi_1$  and  $\psi_2$  MOs to the  $\psi_9$  and  $\psi_{10}$  MOs induces the exchange interaction with the singly occupied  $\psi_5$  and  $\psi_6$  MOs, which corresponds to the spin polarization. Because the high spin state can receive the energy stabilization by this spin-polarization, the benzene ISTC of Cr has a high spin ground state.

(A)  $d_{xz}$  orbital Cr(occ), V(vir), Ti(vir), Sc(vir)

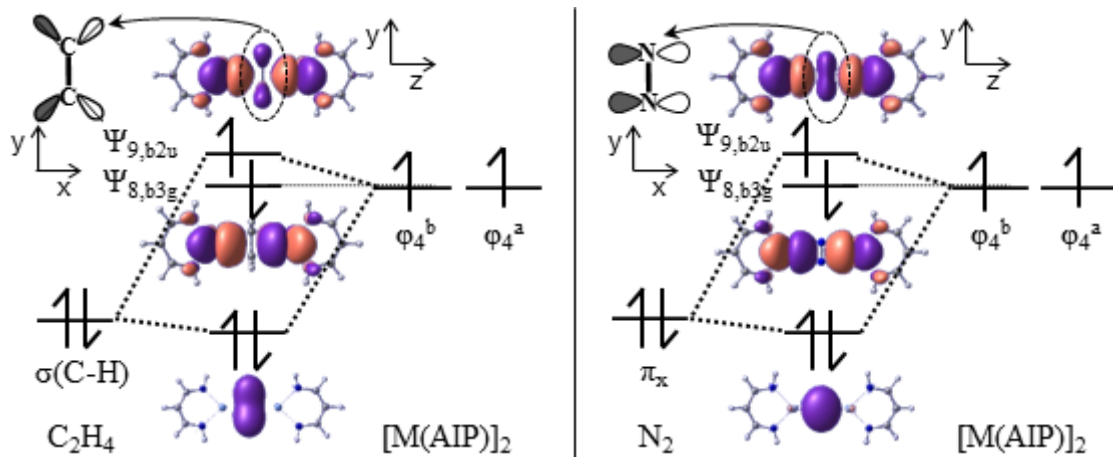

(B)  $d_{z^2-y^2}$  orbital Cr(occ), V(occ), Ti(vir), Sc(vir)

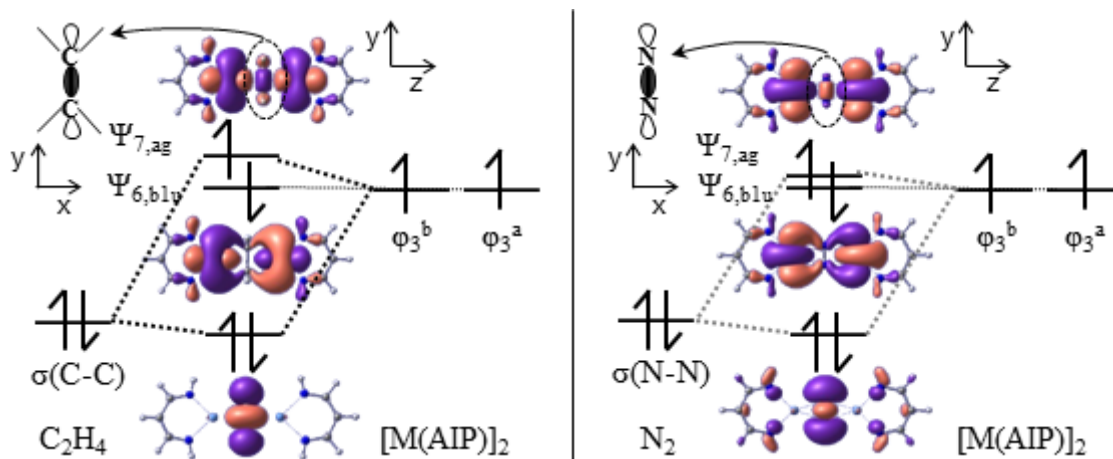

(C)  $d_{xy}$  orbital Cr(occ), V(occ), Ti(occ), Sc(vir)

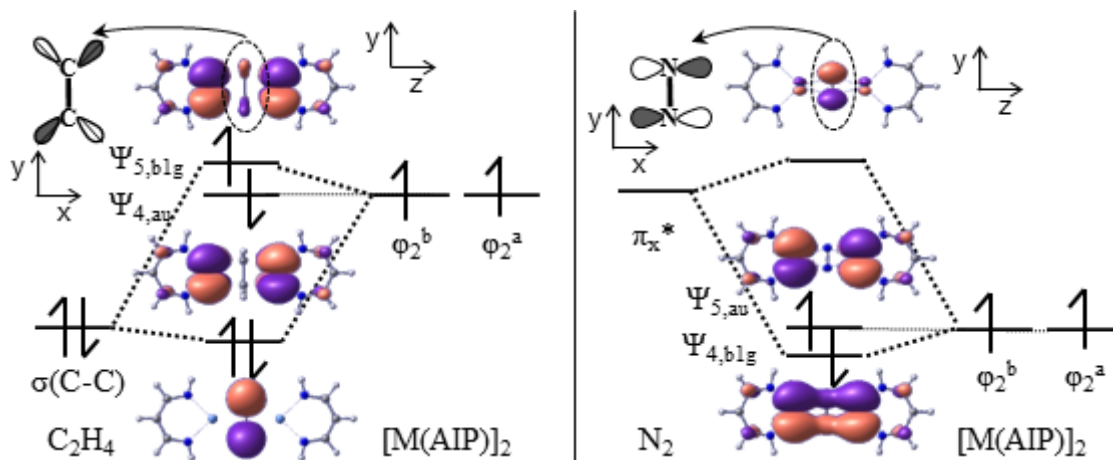

(D)  $d_{x^2}$  orbital Cr(occ), V(occ), Ti(occ), Sc(occ)

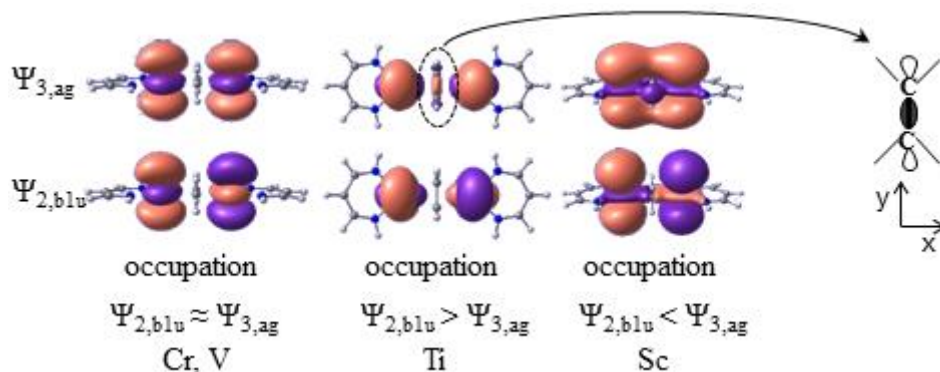

Figure S4. Schematic pictures of orbital energy splitting between bonding and anti-bonding pair d orbitals in  $(\mu\text{-}\eta^2\text{:}\eta^2\text{-C}_2\text{H}_4)[\text{M}(\text{AIP})]_2$  and  $(\mu\text{-}\eta^2\text{:}\eta^2\text{-N}_2)[\text{M}(\text{AIP})]_2$  (M = Sc to Cr).

### The explanation of the occupation numbers in the $\psi_{2,blu}$ and $\psi_{3,ag}$

In the Cr and V complexes, the  $\psi_{2,blu}$  and  $\psi_{3,ag}$  mainly consist of the metal  $d_{x^2}$  orbitals. Because the d orbital is compact, the  $\psi_{2,blu}$  and  $\psi_{3,ag}$  are almost degenerate, leading to the presence of similar occupation numbers in these two orbitals; see Table 3.

In the Ti complex, the occupation number of the  $\psi_{3,ag}$  is moderately larger than that of  $\psi_{2,blu}$ . Because the size of d orbital is larger in Ti than in V, the anti-bonding overlap between the doubly occupied C-H  $\sigma$ -orbitals of ethylene and the  $\phi_1^b$  increases in the  $\psi_{3,ag}$ , which leads to the smaller occupation number in the  $\psi_{3,ag}$  than in  $\psi_{2,blu}$ .

Because the size of d orbital becomes further larger in Sc than in Ti, a direct bonding overlap between two  $d_{x^2}$  orbitals is formed in the  $\psi_{2,blu}$ . Thus, the larger occupation of  $\psi_{3,ag}$  than that of the  $\psi_{2,blu}$  is favorable to stabilize the system.

Table S6. Relative energies (in kcal/mol) of various spin multiplicities in  $(\mu\text{-C}_2\text{H}_4)[\text{M}(\text{AIP})]_2$  ( $\text{M} = \text{Cr}, \text{Mn}$ ) with  $\text{D}_{2\text{h}}$  and  $\text{C}_{2\text{h}}$  structures calculated by the CASSCF method.

| spin<br>multiplicity | Cr                     |                        | Mn                     |                        |
|----------------------|------------------------|------------------------|------------------------|------------------------|
|                      | $\text{C}_{2\text{h}}$ | $\text{D}_{2\text{h}}$ | $\text{C}_{2\text{h}}$ | $\text{D}_{2\text{h}}$ |
| 11                   |                        |                        | 0.00                   | 31.5                   |
| 9                    | 1.1                    | 6.0                    | 0.02                   | 31.0                   |
| 7                    | 0.8                    | 5.4                    | 0.04                   | 30.6                   |
| 5                    | 0.4                    | 4.8                    | 0.05                   | 30.3                   |
| 3                    | 0.1                    | 4.4                    | 0.06                   | 30.1                   |
| 1                    | 0.0                    | 4.2                    | 0.06                   | 30.0                   |

(A)  $\eta^2$ -side-on

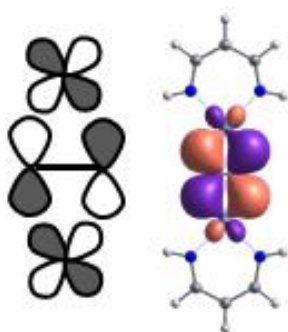

(B)  $\eta^1$ -end-on

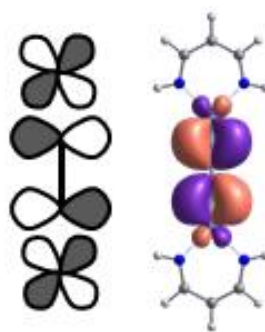

Figure S5. The bonding  $\psi_{1,b2g}$  MO of  $(\mu\text{-N}_2)[\text{Cr}(\text{AIP})]_2$  with (A)  $\eta^2$ -side-on and (B)  $\eta^1$ -end-on coordination structures. The  $\psi_{1,b2g}$  MO in the  $\eta^1$ -end-on structure is less stable in energy than that of  $\eta^2$ -side-on one because of the smaller  $d_\pi\text{-}\pi^*$  overlap than in the  $\eta^2$ -side-on structure.

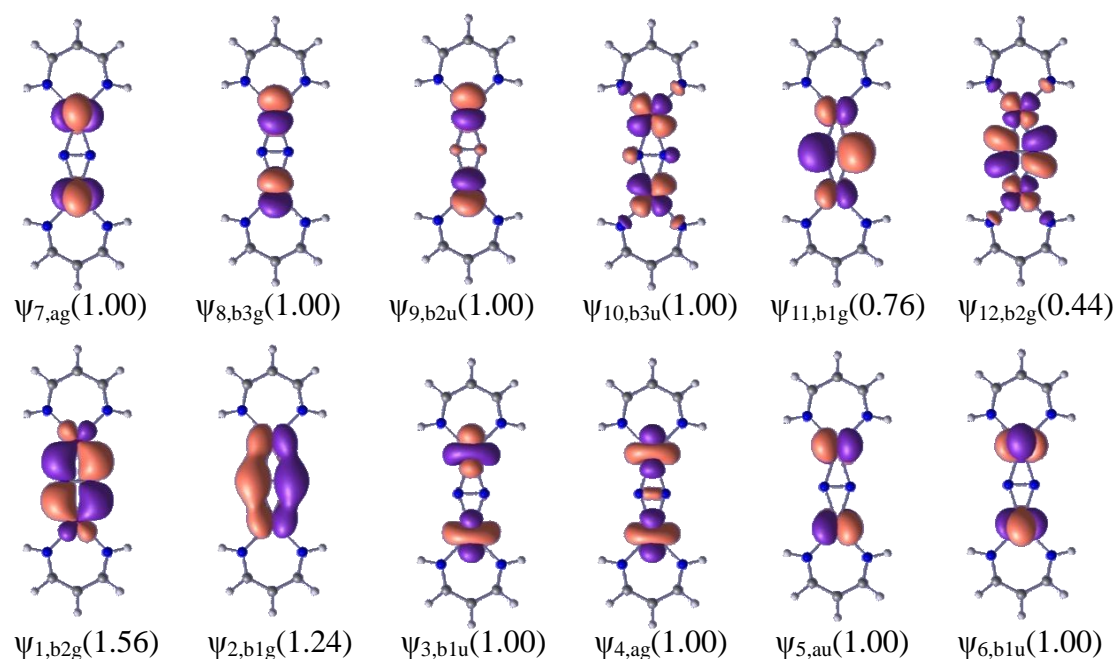

Figure S6. CASSCF-calculated natural orbitals of  $(\mu\text{-}\eta^2:\eta^2\text{-N}_2)[\text{Mn}(\text{AIP})]_2$ . The subscript represents irreducible representation under  $D_{2h}$  symmetry. In parentheses are occupation numbers in the nonet state.

Table S7. Orbital energies (in eV) of  $\pi$  and  $\pi^*$  orbitals of  $\text{C}_2\text{H}_4$  and  $\text{N}_2$  calculated by the HF method.

|                        |         | cc-pVDZ | cc-pVTZ | cc-pVQZ | cc-pV5Z |
|------------------------|---------|---------|---------|---------|---------|
| $\text{C}_2\text{H}_4$ | $\pi^*$ | 4.7     | 4.2     | 3.9     | 3.6     |
|                        | $\pi$   | -10.2   | -10.2   | -10.3   | -10.3   |
| $\text{N}_2$           | $\pi^*$ | 4.8     | 4.4     | 4.2     | 3.9     |
|                        | $\pi$   | -16.5   | -16.7   | -16.7   | -16.7   |

Table S8. Main electron configurations of the CASSCF wavefunction with natural orbitals and the CASCI wavefunction with localized orbitals of  $(\mu\text{-N}_2)[\text{Mn}(\text{AIP})]_2$ .

(A)  ${}^9\text{A}_u$  state in  $\eta^1$ -end-on

CASSCF with natural orbitals

| Configuration |          |          |          |          |          |          |          |          |             |             |             | Coefficient |
|---------------|----------|----------|----------|----------|----------|----------|----------|----------|-------------|-------------|-------------|-------------|
| $\Psi_1$      | $\Psi_2$ | $\Psi_3$ | $\Psi_4$ | $\Psi_5$ | $\Psi_6$ | $\Psi_7$ | $\Psi_8$ | $\Psi_9$ | $\Psi_{10}$ | $\Psi_{11}$ | $\Psi_{12}$ |             |
| 2             | 2        | $\alpha$    | 0           | 0           | 0.5630      |
| 2             | $\alpha$    | $\beta$     | 0           | 0.3378      |
| $\alpha$      | 2        | $\alpha$    | 0           | $\beta$     | -0.2845     |
| 2             | 0        | $\alpha$    | 2           | 0           | -0.2409     |
| 0             | 2        | $\alpha$    | 0           | 2           | -0.2273     |
| $\beta$       | 2        | $\alpha$    | 0           | $\alpha$    | 0.2137      |
| 2             | $\beta$  | $\alpha$    | $\alpha$    | 0           | -0.1927     |

CASCI with localized orbitals

| Configuration         |               |               |               |               |               |               |               |               |               | Coefficient    |           |         |
|-----------------------|---------------|---------------|---------------|---------------|---------------|---------------|---------------|---------------|---------------|----------------|-----------|---------|
| [M(AIP)] <sub>2</sub> |               |               |               |               |               |               |               |               |               | N <sub>2</sub> |           |         |
| $\varphi_1^a$         | $\varphi_1^b$ | $\varphi_2^a$ | $\varphi_2^b$ | $\varphi_3^a$ | $\varphi_3^b$ | $\varphi_4^a$ | $\varphi_4^b$ | $\varphi_5^a$ | $\varphi_5^b$ | $\pi_y^*$      | $\pi_x^*$ |         |
| $\alpha$              | $\alpha$      | $\alpha$      | $\alpha$      | $\alpha$      | $\alpha$      | $\alpha$      | $\alpha$      | $\alpha$      | $\alpha$      | $\beta$        | $\beta$   | 0.8150  |
| $\alpha$              | $\alpha$      | $\alpha$      | $\alpha$      | $\alpha$      | $\alpha$      | $\alpha$      | $\alpha$      | $\alpha$      | 2             | 0              | $\beta$   | 0.2079  |
| $\alpha$              | $\alpha$      | $\alpha$      | $\alpha$      | $\alpha$      | $\alpha$      | $\alpha$      | 2             | $\alpha$      | $\alpha$      | $\beta$        | 0         | -0.2014 |
| $\alpha$              | $\alpha$      | $\alpha$      | $\alpha$      | $\alpha$      | $\alpha$      | $\alpha$      | $\alpha$      | $\alpha$      | $\beta$       | $\alpha$       | $\beta$   | -0.1659 |
| $\alpha$              | $\alpha$      | $\alpha$      | $\alpha$      | $\alpha$      | $\alpha$      | $\alpha$      | $\alpha$      | $\alpha$      | 0             | 2              | $\beta$   | -0.1569 |
| $\alpha$              | $\alpha$      | $\alpha$      | $\alpha$      | $\alpha$      | $\alpha$      | $\alpha$      | $\beta$       | $\alpha$      | $\alpha$      | $\beta$        | $\alpha$  | -0.1542 |

(B)  ${}^9B_{2u}$  state in  $\eta^2$ -side-on

CASSCF with natural orbitals

| Configuration |          |          |          |          |          |          |          |          |             |             |             | Coefficient |
|---------------|----------|----------|----------|----------|----------|----------|----------|----------|-------------|-------------|-------------|-------------|
| $\Psi_1$      | $\Psi_2$ | $\Psi_3$ | $\Psi_4$ | $\Psi_5$ | $\Psi_6$ | $\Psi_7$ | $\Psi_8$ | $\Psi_9$ | $\Psi_{10}$ | $\Psi_{11}$ | $\Psi_{12}$ |             |
| 2             | $\alpha$    | $\beta$     | 0           | 0.5290      |
| 2             | 2        | $\alpha$    | 0           | 0           | -0.4778     |
| 2             | 0        | $\alpha$    | 2           | 0           | 0.2728      |
| $\beta$       | $\alpha$    | $\beta$     | $\alpha$    | -0.2573     |
| 0             | $\alpha$    | $\beta$     | 2           | -0.2044     |
| $\alpha$      | $\alpha$ | $\alpha$ | $\alpha$ | $\alpha$ | $\alpha$ | $\alpha$ | $\alpha$ | $\alpha$ | $\alpha$    | $\beta$     | $\beta$     | 0.1848      |
| $\alpha$      | 2        | $\alpha$    | $\alpha$    | $\beta$     | -0.1820     |

CASCI with localized orbitals

| Configuration         |               |               |               |               |               |               |               |               |               | Coefficient    |           |         |
|-----------------------|---------------|---------------|---------------|---------------|---------------|---------------|---------------|---------------|---------------|----------------|-----------|---------|
| [M(AIP)] <sub>2</sub> |               |               |               |               |               |               |               |               |               | N <sub>2</sub> |           |         |
| $\varphi_1^a$         | $\varphi_1^b$ | $\varphi_2^a$ | $\varphi_2^b$ | $\varphi_3^a$ | $\varphi_3^b$ | $\varphi_4^a$ | $\varphi_4^b$ | $\varphi_5^a$ | $\varphi_5^b$ | $\pi_y^*$      | $\pi_x^*$ |         |
| $\alpha$              | $\alpha$      | $\alpha$      | $\alpha$      | $\alpha$      | $\alpha$      | $\alpha$      | $\alpha$      | $\alpha$      | $\alpha$      | $\beta$        | $\beta$   | 0.8138  |
| $\alpha$              | $\alpha$      | $\alpha$      | $\alpha$      | $\alpha$      | $\alpha$      | $\alpha$      | $\alpha$      | 0             | $\alpha$      | 2              | $\beta$   | 0.2424  |
| $\alpha$              | $\alpha$      | $\alpha$      | $\alpha$      | $\alpha$      | $\alpha$      | $\alpha$      | $\alpha$      | 2             | $\alpha$      | 0              | $\beta$   | 0.2301  |
| $\alpha$              | $\alpha$      | $\alpha$      | $\alpha$      | $\alpha$      | $\alpha$      | $\alpha$      | $\alpha$      | $\beta$       | $\alpha$      | $\alpha$       | $\beta$   | 0.2111  |
| $\alpha$              | $\alpha$      | $\alpha$      | $\alpha$      | $\alpha$      | $\alpha$      | $\alpha$      | $\alpha$      | $\alpha$      | $\beta$       | $\alpha$       | $\beta$   | 0.1483  |
| $\alpha$              | $\alpha$      | $\alpha$      | $\alpha$      | $\alpha$      | $\alpha$      | 2             | $\alpha$      | $\alpha$      | $\alpha$      | $\beta$        | 0         | -0.1143 |

Table S9. Occupation numbers of CASSCF natural orbitals in  $[(\mu\text{-}\eta^2\text{:}\eta^2\text{-C}_2\text{H}_4)\text{Cr}(\text{AIP})_2]^-$  and  $[(\mu\text{-}\eta^2\text{:}\eta^2\text{-C}_2\text{H}_4)\text{Mn}(\text{AIP})_2]^+$ .

|                               | $[(\mu\text{-}\eta^2\text{:}\eta^2\text{-C}_2\text{H}_4)\text{Cr}(\text{AIP})_2]^-$ | $[(\mu\text{-}\eta^2\text{:}\eta^2\text{-C}_2\text{H}_4)\text{Mn}(\text{AIP})_2]^+$ |
|-------------------------------|-------------------------------------------------------------------------------------|-------------------------------------------------------------------------------------|
| $\Psi_{11,\text{b}2\text{g}}$ | 0.19                                                                                | 0.47                                                                                |
| $\Psi_{10,\text{b}3\text{u}}$ | 1.00                                                                                | 1.00                                                                                |
| $\Psi_{9,\text{b}2\text{u}}$  | 1.00                                                                                | 1.00                                                                                |
| $\Psi_{8,\text{b}3\text{g}}$  | 1.00                                                                                | 1.00                                                                                |
| $\Psi_{7,\text{a}g}$          | 1.00                                                                                | 1.00                                                                                |
| $\Psi_{6,\text{b}1\text{u}}$  | 1.00                                                                                | 1.00                                                                                |
| $\Psi_{5,\text{b}1\text{g}}$  | 1.00                                                                                | 1.00                                                                                |
| $\Psi_{4,\text{a}u}$          | 1.00                                                                                | 1.00                                                                                |
| $\Psi_{3,\text{a}g}$          | 1.00                                                                                | 1.00                                                                                |
| $\Psi_{2,\text{b}1\text{u}}$  | 1.00                                                                                | 1.00                                                                                |
| $\Psi_{1,\text{b}2\text{g}}$  | 1.81                                                                                | 1.53                                                                                |
